# Supplementary material
Source: PubMed Central journal article supplement (PMC6879370)
Supplement: plantbiotechnology-35-3-18.0508a-s002.pdf [file plantbiotechnology-35-3-18.0508a-s002.pdf]

| Primer sequence                          | Purpose                                    | Reference                                                          |
|------------------------------------------|--------------------------------------------|--------------------------------------------------------------------|
| 5' GAGACATCTGGGACGAGCTG 3'               | OsAP2 qPCR-forward                         | Jang and Li (2017) <i>Frontiers in Plant Science</i> 8: 1253       |
| 5' TCAGCTTACGAACAGCTG 3'                 | OsAP2 qPCR-reverse                         |                                                                    |
| 5' CACTTTGACTGGAGGCCGGA 3'               | OsWRKY24 qPCR-forward                      | Jang and Li (2017) <i>Frontiers in Plant Science</i> 8: 1253       |
| 5' GCGCCGTCTGAAACGAGAAG 3'               | OsWRKY24 qPCR-reverse                      |                                                                    |
| 5' GAAGAGGCAAGAGGGTGAG 3'                | OsAP2 RT-PCR forward                       | Jang and Li (2017) <i>Frontiers in Plant Science</i> 8: 1253       |
| 5' TCAGCTTACGAACAGCTG 3'                 | OsAP2 RT-PCR reverse                       |                                                                    |
| 5' CAAAAAGCAGGCTTCGACGGCTACAACCTGGCG 3'  | OsWRKY24 RT-PCR forward                    | Jang and Li (2017) <i>Frontiers in Plant Science</i> 8: 1253       |
| 5' CAGTAGACCGAGTTCTGGAAGAAC 3'           | OsWRKY24 RT-PCR reverse                    |                                                                    |
| 5' ACGACGGCTACAACCTGGCG 3'               | OsWRKY24:SRDX RT-PCR forward               | In this study                                                      |
| 5' GTTCGAGATCCAGGTCTAGGTAGAGCGAGTTCTG 3' | OsWRKY24:SRDX RT-PCR reverse               |                                                                    |
| 5' GATCTTTGCCGGAAAAACAATTGGAGGATGGT 3'   | Arabidopsis UBQ10 forward (RT-PCR)         | Ahn (2009) <i>Cold Spring Harb Protoc</i> doi:10.1101/pdb.prot5296 |
| 5' CGACTTGTCAATTAGAAAGAAAGAGATAACAGG 3'  | Arabidopsis UBQ10 reverse (RT-PCR)         |                                                                    |
| 5' GGTAACATTGTGCTCAGTGGTGG 3'            | Arabidopsis Actin forward (qPCR)           | Jang et al. (2009) <i>Plant Journal</i> 60(4): 614-625             |
| 5' AACGACCTTAATCTTCATGTCTGC 3'           | Arabidopsis Actin reverse (qPCR)           |                                                                    |
| 5' CTCCCCATGCTATCCTTCG 3'                | Rice Actin (Os3g50890) forward (qPCR)      | Caldana et al. (2007) <i>Plant methods</i> 3:7                     |
| 5' TGAATGAGTAACCACGCTCCG 3'              | Rice Actin forward (qPCR)                  |                                                                    |
| 5' TAACCCTCCTCAGCAGCAT 3'                | Arabidopsis EXPA1 (At1g69530) qPCR forward | Zhang et al., (2011) <i>Plant Cell Reports</i> 30(1): 27-36        |
| 5' CTTCTCACGCACGGCACT 3'                 | Arabidopsis EXPA1 qPCR reverse             |                                                                    |
| 5' CCATATTTTCGACCTCGTGCT 3'              | Arabidopsis EXPA2 (At5g05290) qPCR forward | Son et al. (2012) <i>Physiologia Plantarum</i> 144(3): 254–262     |
| 5' ACAACAGTCCGACCATCAC 3'                | Arabidopsis EXPA2 qPCR reverse             |                                                                    |
| 5' CACTTCTCCACTTTTCTTCTCGGTT 3'          | Arabidopsis EXPB1 (At2g20750) qPCR forward | Schwachtje et al. (2011) <i>PLoS One</i> e0029382                  |
| 5' TAGTGTCCGGTAGGATGACCGG 3'             | Arabidopsis EXPB1 qPCR reverse             |                                                                    |
| 5' GGCTTATCACACTTACTCAATCCTTTG 3'        | Arabidopsis XTH4 (At2g06850) qPCR forward  | Lee et al. (2005) <i>New Phytologist</i> 165(2): 429–444           |
| 5' TTCGATTGGTATGTTGTCAACA 3'             | Arabidopsis XTH4 qPCR reverse              |                                                                    |
| 5' GCTGGAACGTCCACCCTTAC 3'               | Arabidopsis XTH23 (At4g25810) qPCR forward | Lee et al. (2005) <i>New Phytologist</i> 165(2): 429–444           |
| 5' TCAAAGTCAATCTCGTCCCATGT 3'            | Arabidopsis XTH23 qPCR reverse             |                                                                    |
| 5' TTCTGGAACAATGGGAGGAG 3'               | Arabidopsis EXPA6 (At2g28950) qPCR forward | Son et al. (2012) <i>Physiologia Plantarum</i> 144(3): 254–262     |
| 5' AGCAAAGTTCGGAGGACAGA 3'               | Arabidopsis EXPA6 qPCR reverse             |                                                                    |

**Supplementary Table S1.** Primers used for expression analyses in this study
