# Supplementary material
Source: PubMed Central journal article supplement (PMC6879370)

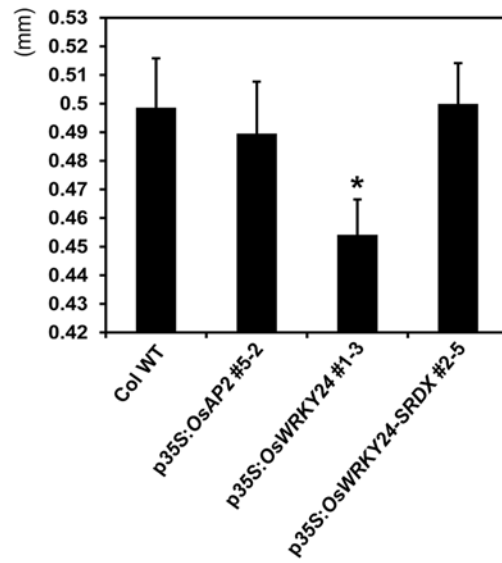

**Supplementary Figure S1.** Average seed length for each genotype used in this study

Supplement: plantbiotechnology-35-3-18.0508a-s001.pdf [file plantbiotechnology-35-3-18.0508a-s001.pdf]
